# Supplementary material for: Exogenous Application of Low-Concentration Sugar Enhances Brassinosteroid Signaling for Skotomorphogenesis by Promoting BIN2 Degradation
Source: MDPI journal article supplement (doi:10.3390/ijms222413588), 2021-12-18
Supplement: s1 [file s1]

## Supplementary Information

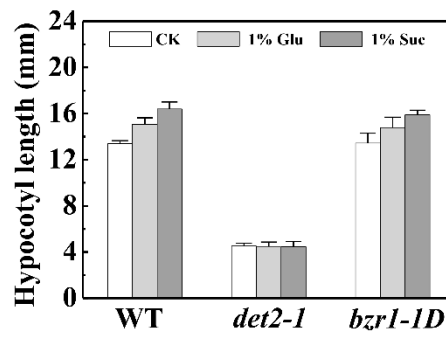

**Figure S1.** Hypocotyl length of WT, *det2-1* and *bzr1-1D* plants treated with glucose. Error bars represent SD (n > 18).

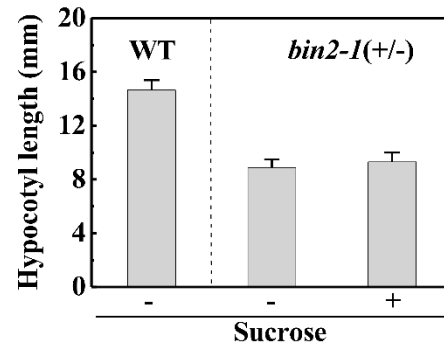

**Figure S2.** Heterozygous *bin2-1(+/-)* mutant in responsive to sucrose. Error bars represent SD (n > 25).

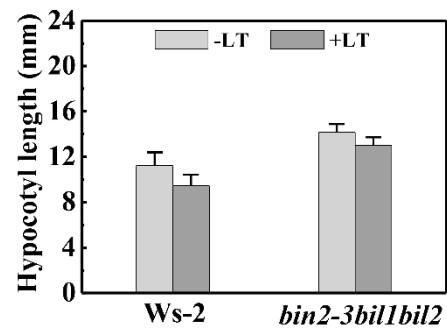

**Figure S3.** Hypocotyl length of Ws-2 and *bin2-3bil1bil2* plants treated with S6K inhibitor (LY2584702 Tosylate, LT). Error bars represent SD (n > 18).

|         |     |                                                                  |
|---------|-----|------------------------------------------------------------------|
| At S6K1 | 1   | MVSSQRPVP-----NKIQKQQYLSTSPNSVLKDDVELEFSDVFGPLPE----EANDIA       |
| At S6K2 | 1   | MVSSQCSVANKNQTGKPFQKHLSTLSTPKSVLGDNLQLQSDVFGPMPEANSEEEACDVA      |
| At S6K1 | 51  | YDEPAVVYSRSHSLVGPCSLDSHSLKLTKLTLLETEDSI DLVECLEGESIKENDDFSGND    |
| At S6K2 | 61  | YDEPAVVYSRSHSLVGPSLVVSHSLKMNKLTLRRETEDSVDLVECEGESIKENDEFSGND     |
| At S6K1 | 111 | DSQNEKALEGDLVKVSGVVGIDDFEVMKVVGKGAFGKVYQVRKKETSEIYAMKVMRKDHI     |
| At S6K2 | 121 | DTDSSEKSP----EEVSGVVGIEDFEVLKVVGQGAFGKVYQVRKKDTSEIYAMKVMRKDKI    |
| At S6K1 | 171 | MEKNHAEYMKAEERDILTKIDHPFIVQLKYSFQTKYRLYLVLDFI NGGHLFFQLYHQGLFR   |
| At S6K2 | 177 | MEKNHAEYMKAEERDILTKIDHPFIVQLKYSFQTKYRLYLVLDFI NGGHLFFQLYHQGLFR   |
| At S6K1 | 231 | EDLARVYTAEIVSAVSHLHEKGI MHRDLKPENILVDTDGHVMLTDFGLAKEFEENTRSNS    |
| At S6K2 | 237 | EDLARVYTAEIVSAVSHLHEKGI MHRDLKPENILVDVDGHVMLTDFGLAKEFEENTRSNS    |
| At S6K1 | 291 | WCGTTEYMAPEIVRGKGHDKAADWWSVGI LLYEMLTGKPPFLGSKGKI QOKI VKDKI KLP |
| At S6K2 | 297 | WCGTTEYMAPEIVRGKGHDKAADWWSVGI LLYEMLTGKPPFLGSKGKI QOKI VKDKI KLP |
| At S6K1 | 351 | QFLSNEAHAILKGLLQKEPERRLGSGLSGAEEIKQHKWFKGINWKKLEAREVMPSFKPEV     |
| At S6K2 | 357 | QFLSNEAHAILKGLLQKEPERRLGSGPSGAEEIKKHKWFKAINWKKLEAREVQPSFKPAV     |
| At S6K1 | 411 | SGRQCI ANFDKCWTDMSVLDSPASSPSSDPKANPFTNFTYVRPPPSFLHQSTTTTL        |
| At S6K2 | 417 | SGRQCI ANFDKCWTDMSVLDSPASSPNSDAKANPFTNFTYVRPPHSFLHRTTSNL         |

**Figure S4.** Amino acid sequence alignment of S6K1 and S6K2.

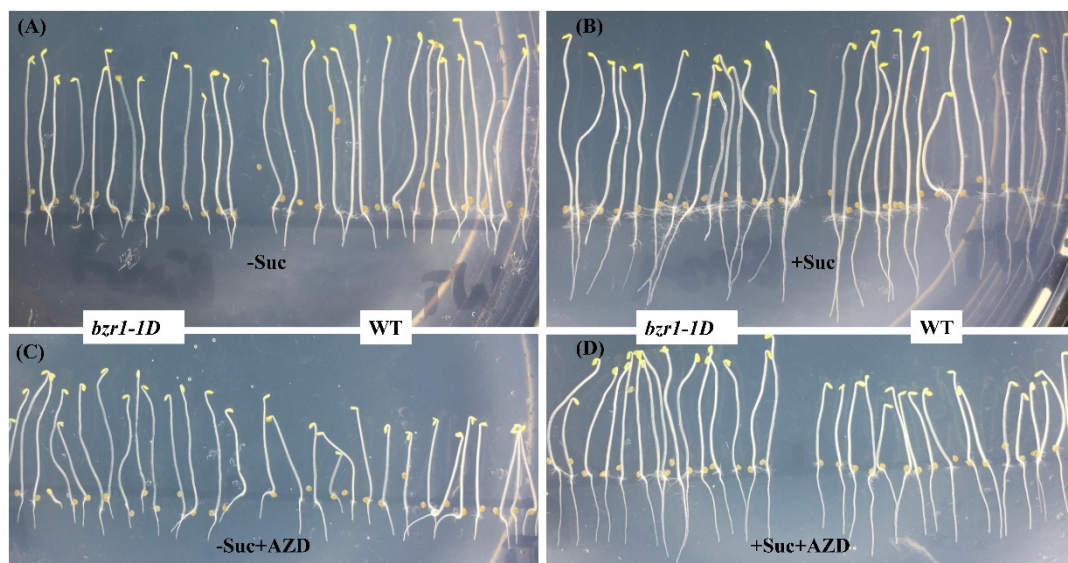

**Figure S5.** Root length of WT and *bsr1-1D* plants with different treatments.

**Table S1.** Primer sequences used for qRT-PCR.

|           |                        |                     |
|-----------|------------------------|---------------------|
| BIN2-qF:  | ACAAAAGGATGCCCCAGAA    | Li et al. (2020)    |
| BIN2-qR:  | TGAAGTTGAAGAGAGGCGGG   |                     |
| BZR1-qF:  | CAACTAGGCAAACCCAAATG   |                     |
| BZR1-qR:  | TCTAACACTCCAATGCTTCC   |                     |
| BIL1-qF:  | AACTCGCGAAGAAATCCGGT   | This study          |
| BIL1-qR:  | AAGGTCAATGGCTTCCGGAG   |                     |
| BIL2-qF:  | TCCATTACCGCCATTGTTCA   | Zhang et al. (2021) |
| BIL2-qR:  | TTCTCTTCAGACATGCACAG   |                     |
| UBQ10-qF: | AATTGGAGGATGGTCGTACTTT | This study          |
| UBQ10-qR: | CAAAGTCTTGACGAAGATCTGC |                     |

Li, J.; Terzaghi, W.; Gong, Y.; Li, C.; Ling, J.J.; Fan, Y.; Qin, N.; Gong, X.; Zhu, D.; Deng, X.W. Modulation of BIN2 kinase activity by HY5 controls hypocotyl elongation in the light. *Nat. Commun.* **2020**, *11*, 1592. <https://doi.org/10.1038/s41467-020-15394-7>.

Zhang, W.; Tang, Y.; Hu, Y.; Yang, Y.; Cai, J.; Liu, H.; Zhang, C.; Liu, X.; Hou, X. Arabidopsis NF-YCs play dual roles in repressing brassinosteroid biosynthesis and signaling during light-regulated hypocotyl elongation. *Plant Cell* **2021**. <https://doi.org/10.1093/plcell/koab112>.
